# Supplementary material for: Potential Risk Factors Associated with Human Cystic Echinococcosis: Systematic Review and Meta-analysis
Source: PLOS journal article supplement (doi:10.1371/journal.pntd.0005114), 2016-11-07
Supplement: S2 (10.1371/journal.pntd.0005114.s002) [file journal.pntd.0005114.s002]

**Supplementary Table 1.** List of studies included in the systematic review after full text screening.

| TITLE                                                                                                                             | REFERENCE                                                                | AUTHOR'S NAME                  | YEAR        | STUDY DESIGN           | DIAGNOSTIC METHOD                    |
|-----------------------------------------------------------------------------------------------------------------------------------|--------------------------------------------------------------------------|--------------------------------|-------------|------------------------|--------------------------------------|
| <b>Epidemiology of echinococcosis in the middle east. 3. A. Study of hydatid disease patients from the city of Beirut</b>         | <b>The American Journal of Tropical Medicine and Hygiene. 13, 681-5.</b> | <b>K. Abou-Daoud, et al.</b>   | <b>1964</b> | <b>Case control</b>    | <b>surgery</b>                       |
| Prevalence and risk factors for echinococcal infection in a rural area of northern Chile: a household-based cross-sectional study | PLOS Neglected Tropical Diseases. 8, 8, e3090.                           | G. Acosta-Jamett, et al.       | 2014        | Cross-sectional        | serology                             |
| Seroprevalence of human cystic echinococcosis and risk factors in animal breeders in rural communities in Denizli, Turkey         | The Journal of Infection in Developing Countries. 8, 9, 1188-94.         | S. Akalin, et al.              | 2014        | Cross-sectional        | serology                             |
| <b>HLA class II alleles: susceptibility or resistance to cystic echinococcosis in Yemeni patients</b>                             | <b>Parasitology Research. 107, 2, 355-61.</b>                            | <b>A. B. Al-Ghoury, et al.</b> | <b>2010</b> | <b>Case control</b>    | <b>not reported</b>                  |
| Seroepidemiology of Human Hydatidosis Using AgB-ELISA Test in Arak, Central Iran                                                  | Iranian Journal of Public Health. 42, 4, 391-6.                          | M. Asghari, et al.             | 2013        | Cross-sectional        | serology                             |
| <b>The evaluation of HLA-DRB1 antigens as susceptibility markers for unilocular cystic echinococcosis in Egyptian patients</b>    | <b>Parasitology Research. 92, 6, 473-7.</b>                              | <b>M. E. Azab, et al.</b>      | <b>2004</b> | <b>Case control</b>    | <b>surgery, imaging and serology</b> |
| Seroepidemiology of Human Hydatidosis in Golestan Province, Iran                                                                  | Iranian J Parasitology. 2, 2, 20-24.                                     | M Baharsefat, et al.           | 2007        | Cross-sectional        | serology                             |
| An epidemiological survey of cystic echinococcosis among Tibetan school pupils in West China                                      | Annals of Tropical Paediatrics. 21, 3, 235-8.                            | Y. Bai, et al.                 | 2001        | Cross-sectional        | serology                             |
| <b>Survey on cystic echinococcosis in Tibetans, West China</b>                                                                    | <b>Acta Tropica. 82, 3, 381-5.</b>                                       | <b>Y. Bai, et al.</b>          | <b>2002</b> | <b>Cross-sectional</b> | <b>ultrasound and serology</b>       |

|                                                                                                                                                      |                                                                               |                                |             |                        |                                      |
|------------------------------------------------------------------------------------------------------------------------------------------------------|-------------------------------------------------------------------------------|--------------------------------|-------------|------------------------|--------------------------------------|
| <b>Echotomographic and serological population-based study of hydatidosis in central Tunisia</b>                                                      | <b>Acta Tropica. 49, 2, 149-53.</b>                                           | <b>A. Bchir, et al.</b>        | <b>1991</b> | <b>Cross-sectional</b> | <b>ultrasound</b>                    |
| <b>A community-based study to examine the epidemiology of human cystic echinococcosis in Rio Negro Province, Argentina</b>                           | <b>Acta Tropica. 136, 81–88.</b>                                              | <b>G. M. Bingham, et al.</b>   | <b>2014</b> | <b>Cross-sectional</b> | <b>ultrasound</b>                    |
| <b>Risk factors for Echinococcus granulosus infection: a case-control study</b>                                                                      | <b>The American Journal of Tropical Medicine and Hygiene. 62, 3, 329-34.</b>  | <b>A. Campos-Bueno, et al.</b> | <b>2000</b> | <b>Case control</b>    | <b>Surgery, imaging and serology</b> |
| <b>Risk factors associated with human cystic echinococcosis in Florida, Uruguay: results of a mass screening study using ultrasound and serology</b> | <b>The American Journal of Tropical Medicine and Hygiene. 58, 5, 599-605.</b> | <b>C. Carmona, et al.</b>      | <b>1998</b> | <b>Cross-sectional</b> | <b>ultrasound</b>                    |
| A sero-epidemiologic study on cystic echinococcosis in midwestern region of Turkey                                                                   | Saudi Medical Journal. 26, 2, 350-1.                                          | Z. Cetinkaya, et al.           | 2005        | Cross-sectional        | serology                             |
| <b>Risk factors associated with human cystic echinococcosis in Jordan: results of a case-control study</b>                                           | <b>Annals of Tropical Medicine and Parasitology. 94, 1, 69-75.</b>            | <b>P. M. Dowling, et al.</b>   | <b>2000</b> | <b>Case control</b>    | <b>surgery</b>                       |
| Seroprevalence of IgG antibodies against Echinococcus granulosus in the population of the region of Thessaly, Central Greece                         | PLoS One. 7, 5, e37112.                                                       | V. Fotiou, et al.              | 2012        | Cross-sectional        | serology                             |
| Cystic echinococcosis on the northeast of the provincial Reserve of Pampa de Achala, Córdoba, Argentina                                              | Revista de Medicina Veterinaria. 89, 2, 41-44.                                | J. C. González Peralta, et al. | 2008        | Cross-sectional        | serology                             |
| Seroprevalence of parasitic zoonoses and their relationship with social factors among the Canadian Inuit in Arctic regions                           | Diagnostic Microbiology and Infectious Disease. 78, 4, 404-10.                | S. Goyette, et al.             | 2014        | Cross-sectional        | serology                             |
| Sonographical and serological survey of human cystic echinococcosis and analysis of risk factors associated with seroconversion in rural             | Zoonoses Public Health. 58, 8, 582-8.                                         | M. F. Harandi, et al.          | 2011        | Cross-sectional        | serology                             |

---

communities of Kerman, Iran

|                                                                                                                                                             |                                                                                          |                               |             |                        |                                   |
|-------------------------------------------------------------------------------------------------------------------------------------------------------------|------------------------------------------------------------------------------------------|-------------------------------|-------------|------------------------|-----------------------------------|
| <b>TAP1 and TAP2 gene polymorphisms in childhood cystic echinococcosis</b>                                                                                  | <b>Parasitology International. 59, 2, 283-5.</b>                                         | <b>N. Kiper, et al.</b>       | <b>2010</b> | <b>Case control</b>    | <b>imaging and serology</b>       |
| <b>A case-control study of the risk factors for cystic echinococcosis among the children of Rio Negro province, Argentina</b>                               | <b>Annals of Tropical Medicine and Public Health. 96, 1, 43-52.</b>                      | <b>E. J. Larrieu, et al.</b>  | <b>2002</b> | <b>Case control</b>    | <b>ultrasound</b>                 |
| <b>Identification of risk factors for cystic echinococcosis in a peri-urban population of Peru</b>                                                          | <b>Transactions of the Royal Society of Tropical Medicine and Hygiene. 102, 1, 75-8.</b> | <b>P. L. Moro, et al.</b>     | <b>2008</b> | <b>Case control</b>    | <b>surgery</b>                    |
| <b>A province-based study using sampling method to investigate the prevalence of cystic echinococcosis among primary school children in Manisa, Turkey</b>  | <b>Acta Tropica. 103, 2, 116-22</b>                                                      | <b>U. Z. Ok, et al.</b>       | <b>2007</b> | <b>Cross-sectional</b> | <b>ultrasound</b>                 |
| The seroprevalences of cystic echinococcosis, and the associated risk factors, in rural-agricultural, bedouin and semi-bedouin communities in Jordan        | Annals of Tropical Medicine and Public Health. 97, 5, 511-20.                            | A. M. Qaqish, et al.          | 2003        | Cross-sectional        | serology                          |
| Human cystic echinococcosis in nomads of south-west Islamic Republic of Iran                                                                                | Eastern Mediterranean Health Journal. 13, 1, 41-8.                                       | A. Rafiei, et al.             | 2007        | Cross-sectional        | serology                          |
| Echinococcosis on the Tibetan Plateau: prevalence and risk factors for cystic and alveolar echinococcosis in Tibetan populations in Qinghai Province, China | Parasitology. 127 Suppl, S109-20.                                                        | P. M. Schantz, et al.         | 2003        | Cross-sectional        | X-ray or ultrasound plus serology |
| <b>An extensive ultrasound and serologic study to investigate the prevalence of human cystic echinococcosis in northern Libya</b>                           | <b>The American Journal of Tropical Medicine and Hygiene. 60, 3, 462-8.</b>              | <b>M. A. Shambesh, et al.</b> | <b>1999</b> | <b>Cross-sectional</b> | <b>ultrasound and serology</b>    |

---

|                                                                                                                                                    |                                                                                          |                                |             |                        |                                |
|----------------------------------------------------------------------------------------------------------------------------------------------------|------------------------------------------------------------------------------------------|--------------------------------|-------------|------------------------|--------------------------------|
| Human hydatidosis : an under discussed occupational zoonosis in India                                                                              | Helminthologia. Vol. 50, No. 2, pp. 87-90.                                               | B. B. R. S. Singh et al.       | 2013        | Cross-sectional        | serology                       |
| <b>Cystic echinococcosis in Mundari tribe-members of South Sudan</b>                                                                               | <b>Pathogen Global Health. 107, 6, 293-8.</b>                                            | <b>B. T. Stewart, et al.</b>   | <b>2013</b> | <b>Cross-sectional</b> | <b>ultrasound</b>              |
| <b>Echinococcosis in Tibetan populations, western Sichuan Province, China</b>                                                                      | <b>Emerging Infectious Diseases journal. 11, 12, 1866-73.</b>                            | <b>L. Tiaoying, et al.</b>     | <b>2005</b> | <b>Cross-sectional</b> | <b>ultrasound</b>              |
| <b>Human cystic echinococcosis in Kyrgystan: an epidemiological study</b>                                                                          | <b>Acta Tropica. 85, 1, 51-61</b>                                                        | <b>P. R. Torgerson, et al.</b> | <b>2003</b> | <b>Cross-sectional</b> | <b>ultrasound</b>              |
| Investigation of risk factors for development of human hydatidosis among households raising livestock in Tibetan areas of western Sichuan province | Chinese journal of parasitology & parasitic disease. 19, 2, 93-6.                        | Q. Wang, et al.                | 2001        | Cross-sectional        | serology                       |
| <b>Cystic echinococcosis in semi-nomadic pastoral communities in north-west China</b>                                                              | <b>Transactions of the Royal Society of Tropical Medicine and Hygiene. 95, 2, 153-8.</b> | <b>Y. H. Wang, et al.</b>      | <b>2001</b> | <b>Cross-sectional</b> | <b>ultrasound</b>              |
| <b>Human cystic echinococcosis in two Mongolian communities in Hobukesar (China) and Bulgan (Mongolia)</b>                                         | <b>Transactions of the Royal Society of Tropical Medicine and Hygiene. 99, 9, 692-8.</b> | <b>Y. Wang, et al.</b>         | <b>2005</b> | <b>Cross-sectional</b> | <b>ultrasound</b>              |
| <b>Community surveys and risk factor analysis of human alveolar and cystic echinococcosis in Ningxia Hui Autonomous Region, China</b>              | <b>Bulletin of the World Health Organization. 84:714-721.</b>                            | <b>Y. R. Yang, et al.</b>      | <b>2006</b> | <b>Cross-sectional</b> | <b>ultrasound and serology</b> |
| <b>Cystic and alveolar echinococcosis: an epidemiological survey in a Tibetan population in southeast Qinghai, China</b>                           | <b>Japanese journal of infectious diseases. 61, 242-246.</b>                             | <b>S. H. Yu, et al.</b>        | <b>2008</b> | <b>Cross-sectional</b> | <b>ultrasound</b>              |
| The serological study of cystic echinococcosis and assessment of surgical cases during 5 years (2007-2011) in Khorram Abad, Iran                   | Nigerian Journal of Clinical Practice. 16, 2, 221-5.                                     | M. Zibaei, et al.              | 2013        | Cross-sectional        | serology                       |

In **bold**, studies used for meta-analysis
